# Supplementary material for: Charge–orbital synergistic engineering of TM@Ti3C2O1−xBx for highly selective CO2 electrochemical reduction
Source: Royal Society of Chemistry journal article supplement (doi:10.1039/d3mh00503h), 2023-01-01
Supplement: d3mh00503h1.pdf [file d3mh00503h1.pdf]

ELECTRONIC SUPPLEMENTARY INFORMATION

**Charge-orbital synergistic engineering of TM@Ti<sub>3</sub>C<sub>2</sub>O<sub>1-x</sub>B<sub>x</sub> for highly selective CO<sub>2</sub> electrochemical reduction**

Jiahe Peng<sup>a,b</sup>, Zuhao Shi<sup>a,b</sup>, Jizhou Jiang<sup>c</sup>, Peng Zhang,<sup>d</sup> Jyh-Ping Hsu,<sup>e</sup> Neng Li,<sup>a,b,c,\*</sup>

<sup>a</sup>State Key Laboratory of Silicate Materials for Architectures, Wuhan University of Technology, Wuhan 430070, China. E-mail: [lineng@whut.edu.cn](mailto:lineng@whut.edu.cn)

<sup>b</sup>Shenzhen Research Institute of Wuhan University of Technology, Shenzhen 518000, Guangdong, China.

<sup>c</sup>School of Chemistry and Environmental Engineering, School of Environmental Ecology and Biological Engineering, Novel Catalytic Materials of Hubei Engineering Research Center, Wuhan Institute of Technology, Wuhan, 430205, China

<sup>d</sup>State Center for International Cooperation on Designer Low-Carbon & Environmental Materials (CDLCEM), School of Materials Science and Engineering, Zhengzhou University, Zhengzhou 450001, Henan, China

<sup>e</sup>Department of Chemical Engineering, "National Taiwan University", Taipei, 10617

This Supplementary Information contains:

Supplementary Figures S1-S9

Supplementary Tables S1-S4

| <b>Supplementary Information contains</b>                                              | <b>Pages</b> |
|----------------------------------------------------------------------------------------|--------------|
| <b>Pourbaix diagrams of SACs</b>                                                       | P2           |
| <b>Fig. S1 PDOSs of TM@B-Ti<sub>3</sub>C<sub>2</sub>O<sub>2</sub></b>                  | P3           |
| <b>Fig. S2 The defined area of H1 sites</b>                                            | P4           |
| <b>Fig. S3 CO<sub>2</sub> adsorption configuration</b>                                 | P4           |
| <b>Fig. S4 PDOS of CO<sub>2</sub> and TM atoms</b>                                     | P5           |
| <b>Fig. S5 ΔG of the 1st hydrogenation reaction</b>                                    | P6           |
| <b>Fig. S6 CDD of molecule adsorbed on TM@Ti<sub>3</sub>C<sub>2</sub>O<sub>2</sub></b> | P7           |
| <b>Fig. S7 PDOSs of CO and TM atoms</b>                                                | P8           |
| <b>Fig. S8 Intermediates along the reaction pathway</b>                                | P9           |
| <b>Fig. S9 CO<sub>2</sub> and CO adsorption configuration</b>                          | P10          |
| <b>Table S1 Cohesive energies (<i>E<sub>c</sub></i>) of metals</b>                     | P11          |
| <b>Table S2 <i>G<sub>ads</sub></i> of reduction products</b>                           | P11          |
| <b>Table S3 Possible reaction steps of CO<sub>2</sub>RR</b>                            | P12          |

**Pourbaix diagrams of TM@Ti<sub>2</sub>CT<sub>x</sub>**

For an electrochemical reaction, not only AIMD simulation but also the Pourbaix diagram is necessary to evaluate the stability of materials in aqueous solution. Composed by equilibrium lines that separate two different phases, Pourbaix diagrams<sup>1, 2</sup> can serve as a useful tool to identify the stable state of catalysts in water as a function of pH and applied potential. To demonstrate the stability of MXene-based SACs, their oxidation reactions (Eq. S1-2) are considered as:

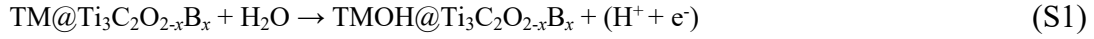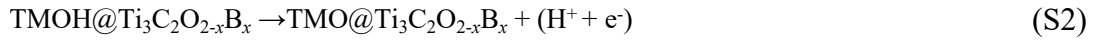

The free energy change ( $\Delta G$ ) of these reactions are computed as:

$$\Delta G = G_{\text{TMOH@Ti}_3\text{C}_2\text{O}_{2-x}\text{B}_x} + (G_{\text{H}^+} + G_{\text{e}^-}) - G_{\text{TM@Ti}_3\text{C}_2\text{O}_{2-x}\text{B}_x} - G_{\text{H}_2\text{O}} \quad (\text{S3})$$

$$\Delta G = G_{\text{TMO@Ti}_3\text{C}_2\text{O}_{2-x}\text{B}_x} + (G_{\text{H}^+} + G_{\text{e}^-}) - G_{\text{TMOH@Ti}_3\text{C}_2\text{O}_{2-x}\text{B}_x} \quad (\text{S4})$$

Where  $G_{\text{TMOH@Ti}_3\text{C}_2\text{O}_{2-x}\text{B}_x}$ ,  $G_{\text{TM@Ti}_3\text{C}_2\text{O}_{2-x}\text{B}_x}$ ,  $G_{\text{TMO@Ti}_3\text{C}_2\text{O}_{2-x}\text{B}_x}$  and  $G_{\text{H}_2\text{O}}$  are calculated with DFT. According to the CHE model,  $G_{\text{H}^+} + G_{\text{e}^-}$  can be represented as  $1/2 \text{H}_2$  on standard hydrogen electrode (SHE) scale:

$$G_{\text{H}^+} + G_{\text{e}^-} = 1/2 G_{\text{H}_2} - eU_{\text{SHE}} - 0.059\text{pH} \quad (\text{S5})$$

Then the effect of pH and  $U_{\text{SHE}}$  can be contained as:

$$\Delta G (U, \text{pH}) = \Delta G - U_{\text{SHE}} - 0.059\text{pH} \quad (\text{S6})$$

The equilibrium line represents the values of pH and  $U_{\text{SHE}}$  when  $\Delta G (U, \text{pH}) = 0$ .

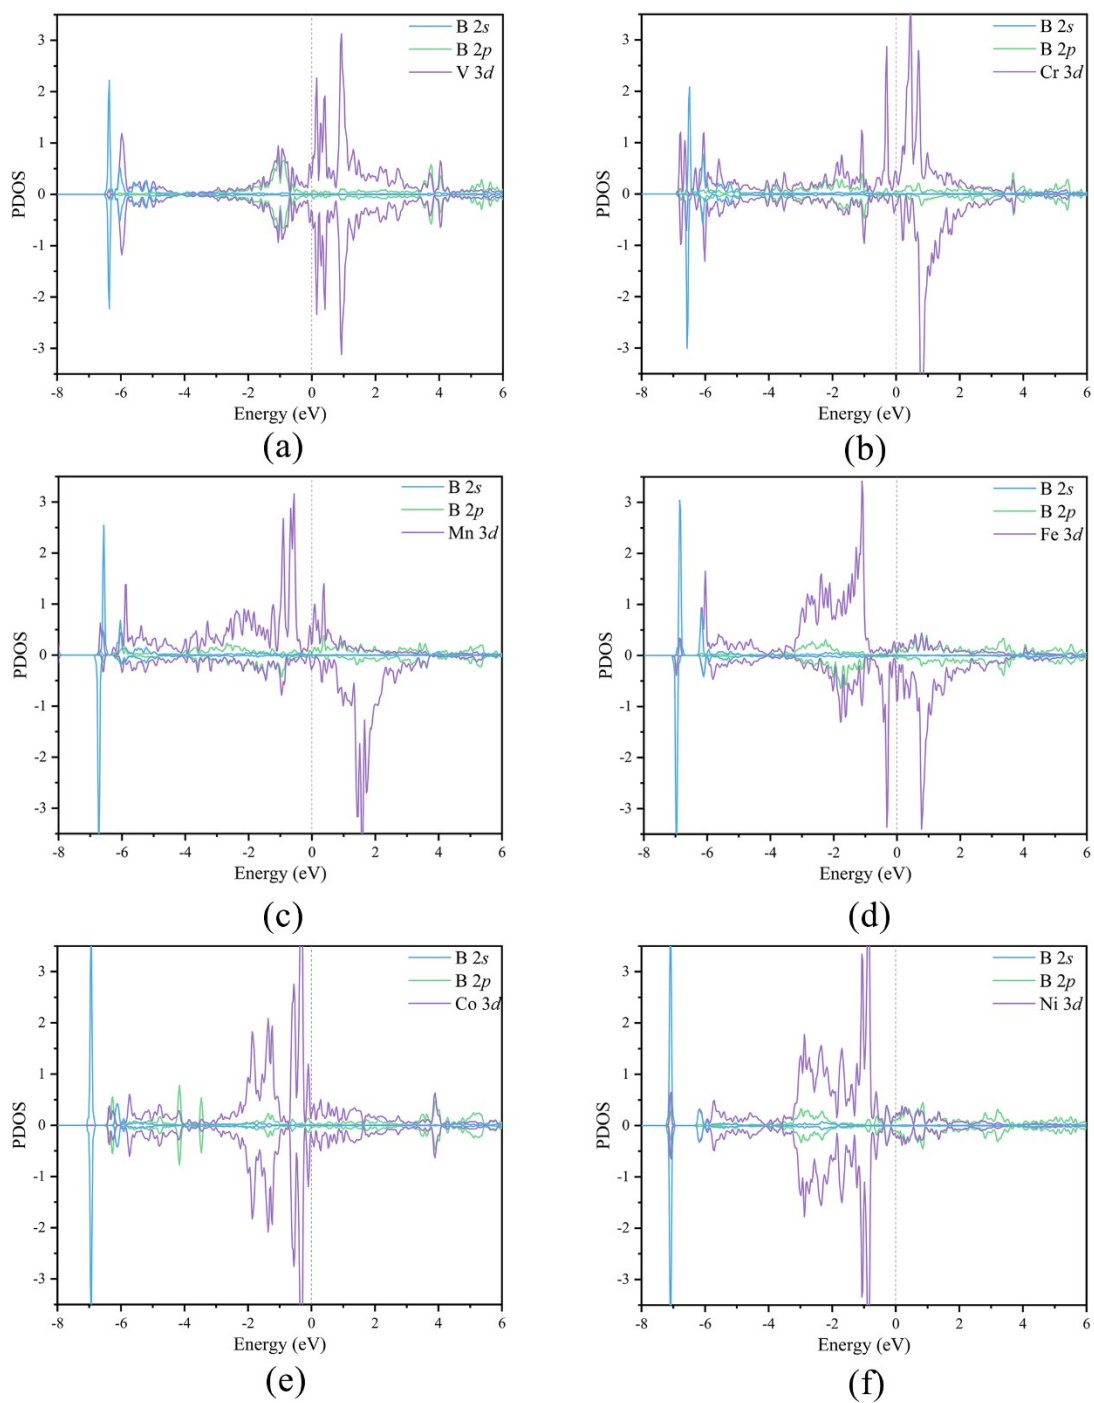

**Fig. S1** DFT-calculated Projected densities of states (PDOSs) of  $\text{TM@Ti}_3\text{C}_2\text{O}_{2-x}\text{B}_x$ , where  $\text{TM} = \text{V}, \text{Cr}, \text{Mn}, \text{Fe}, \text{Co}$  and  $\text{Ni}$ . The Fermi level is set to zero in black dashed line.

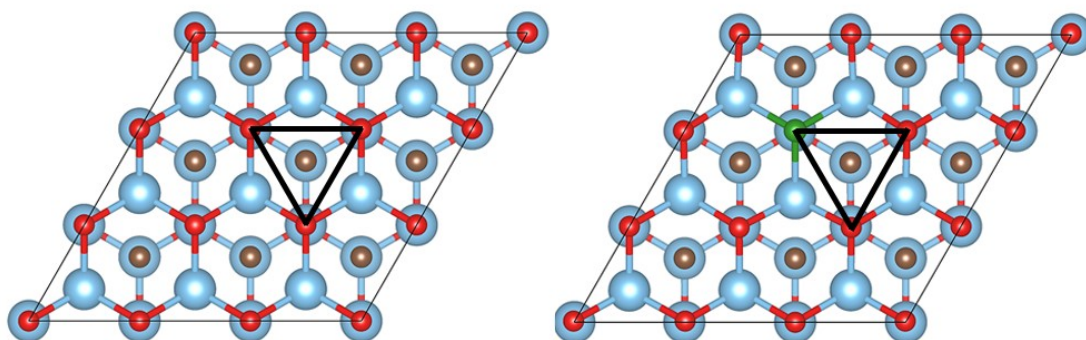

**Fig. S2** The defined area of H1 sites on  $\text{Ti}_3\text{C}_2\text{O}_2$  and  $\text{Ti}_3\text{C}_2\text{O}_{2-x}\text{B}_x$  TM.

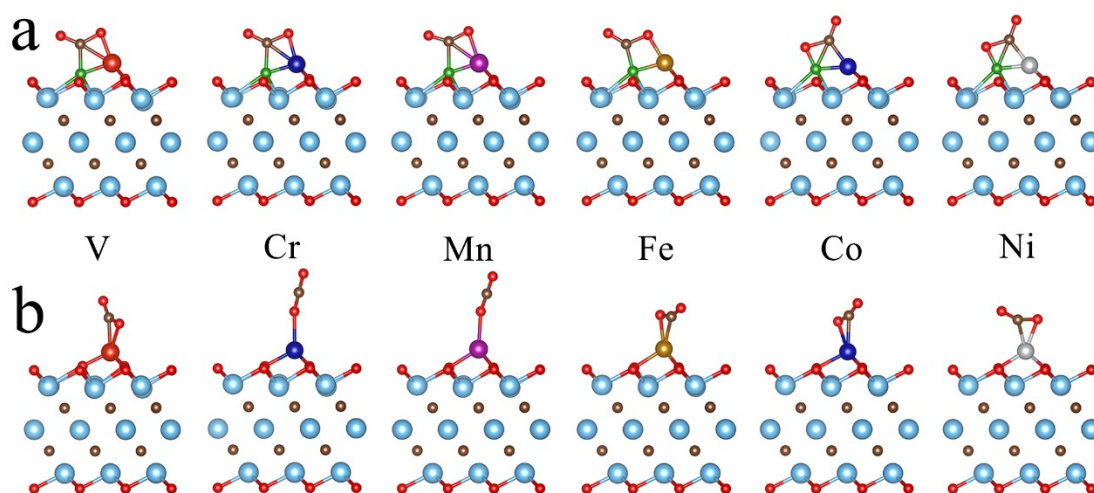

**Fig. S3** Optimized geometric structures of  $\text{CO}_2$  adsorbed on  $\text{TM}@\text{Ti}_3\text{C}_2\text{O}_{2-x}\text{B}_x$  (a) and  $\text{TM}@\text{Ti}_3\text{C}_2\text{O}_2$  (b).

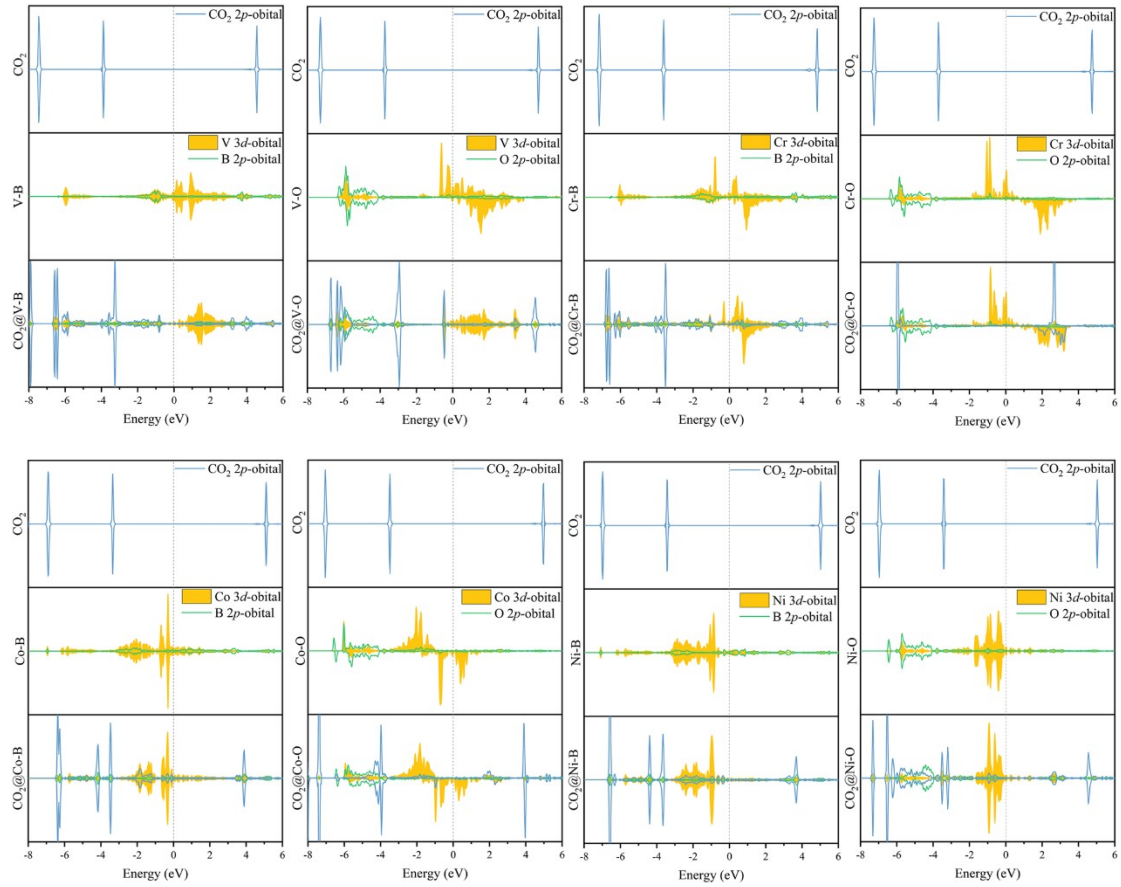

**Fig. S4** The PDOS of  $\text{CO}_2$  2p, TM 3d and coordination atoms 2p orbital before and after  $\text{CO}_2$  adsorption on  $\text{TM}@\text{Ti}_3\text{C}_2\text{O}_{2-x}\text{B}_x$  and  $\text{TM}@\text{Ti}_3\text{C}_2\text{O}_2$ .

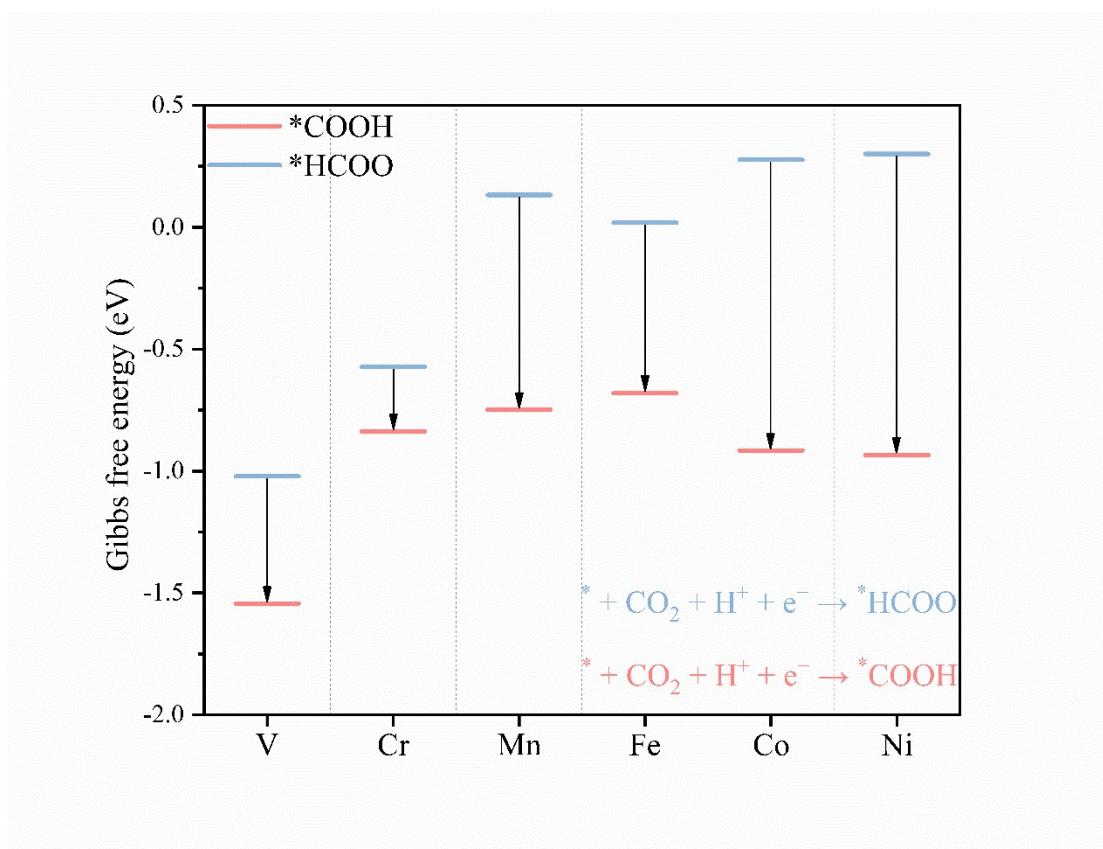

**Fig. S5** Gibbs free energy changes of the 1<sup>st</sup> hydrogenation reaction for the CO<sub>2</sub> reduction on TM@Ti<sub>3</sub>C<sub>2</sub>O<sub>2-x</sub>B<sub>x</sub>.

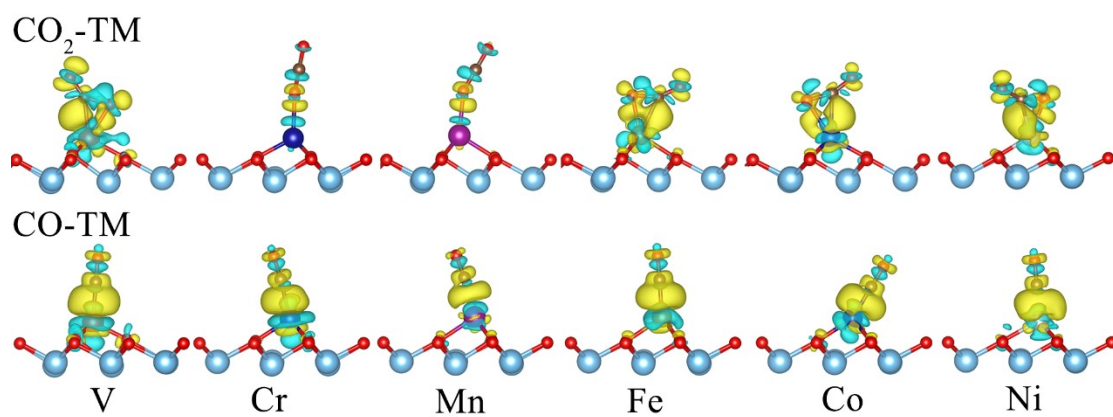

**Fig. S6** The charge density differences of TM@Ti<sub>3</sub>C<sub>2</sub>O<sub>2</sub> with CO<sub>2</sub> and CO adsorption configurations.

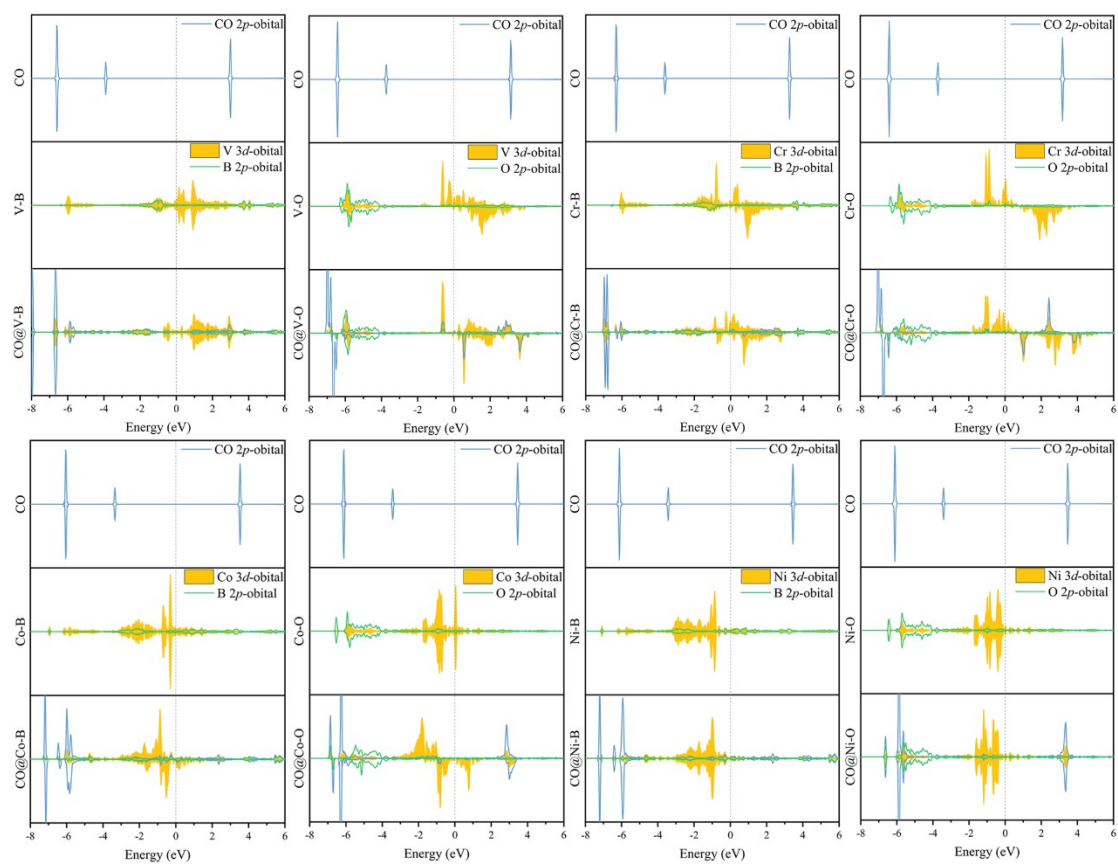

**Fig. S7** The PDOS of CO  $2p$ , TM  $3d$  and coordination atoms  $2p$  orbital before and after CO adsorption on  $\text{TM}@\text{Ti}_3\text{C}_2\text{O}_{2-x}\text{B}_x$  and  $\text{TM}@\text{Ti}_3\text{C}_2\text{O}_2$ .



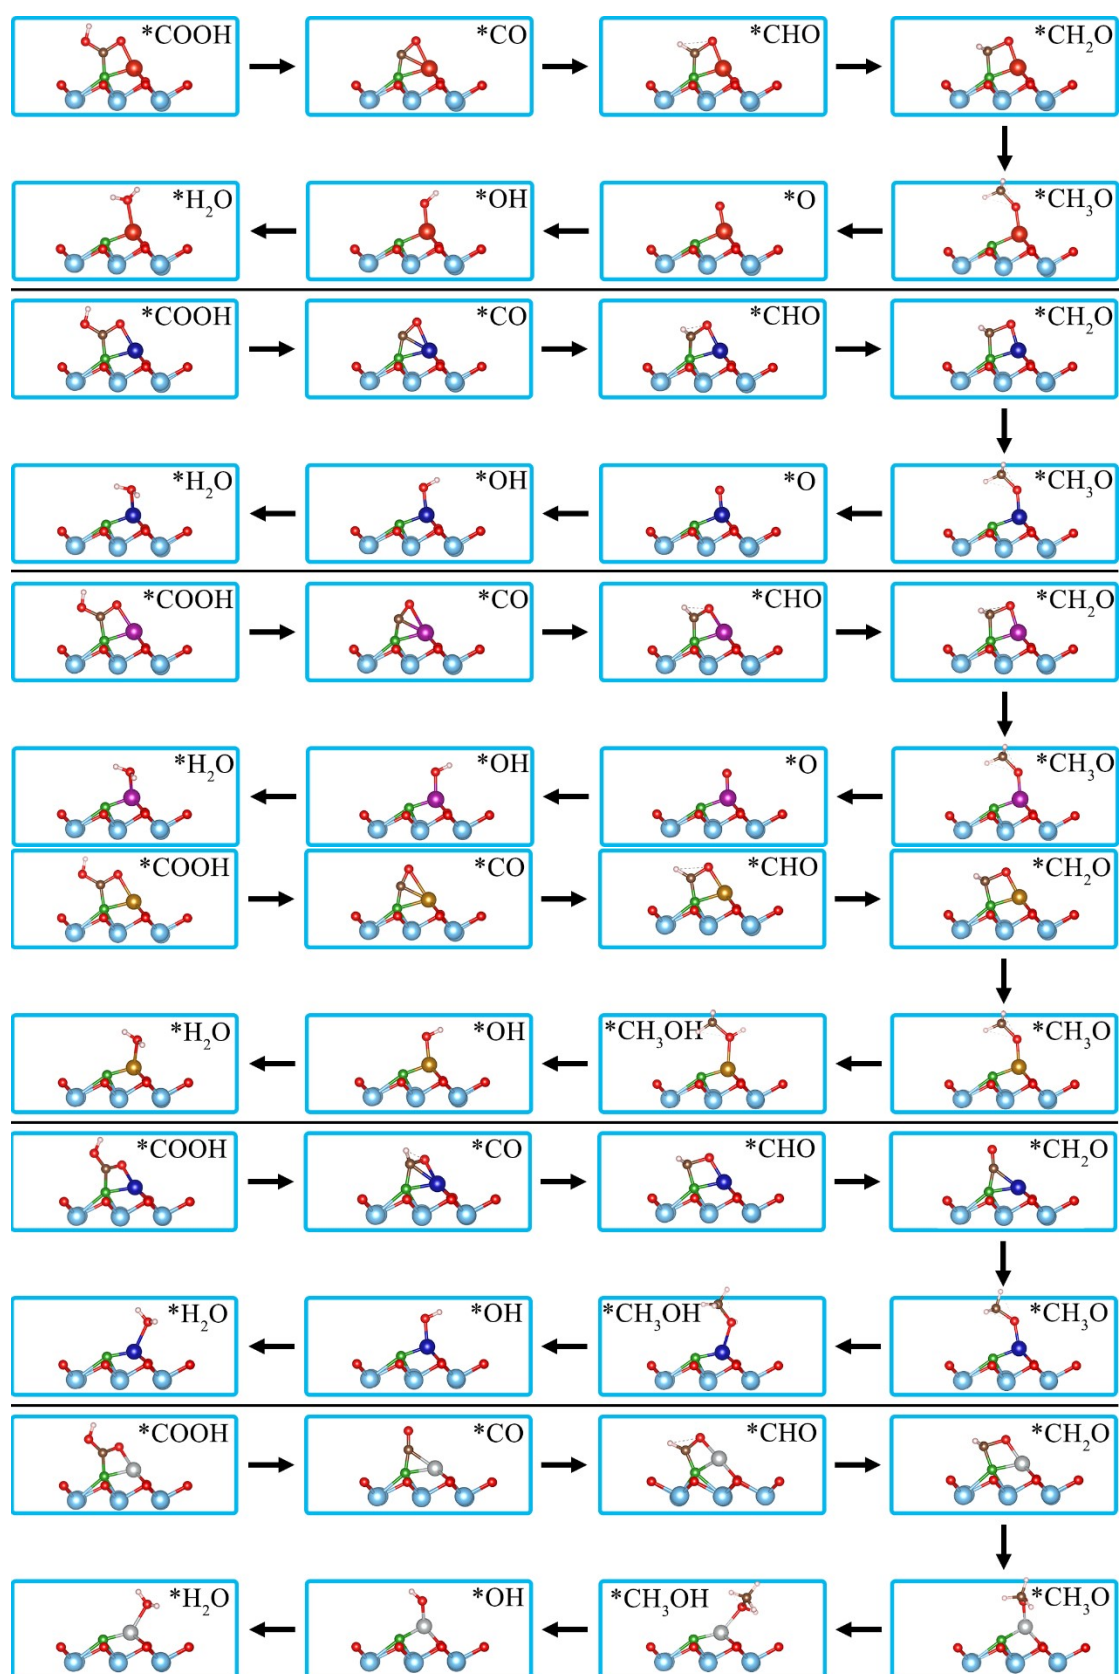

Fig. S8 DFT-optimized structures along the reaction pathway of CO<sub>2</sub>RR.

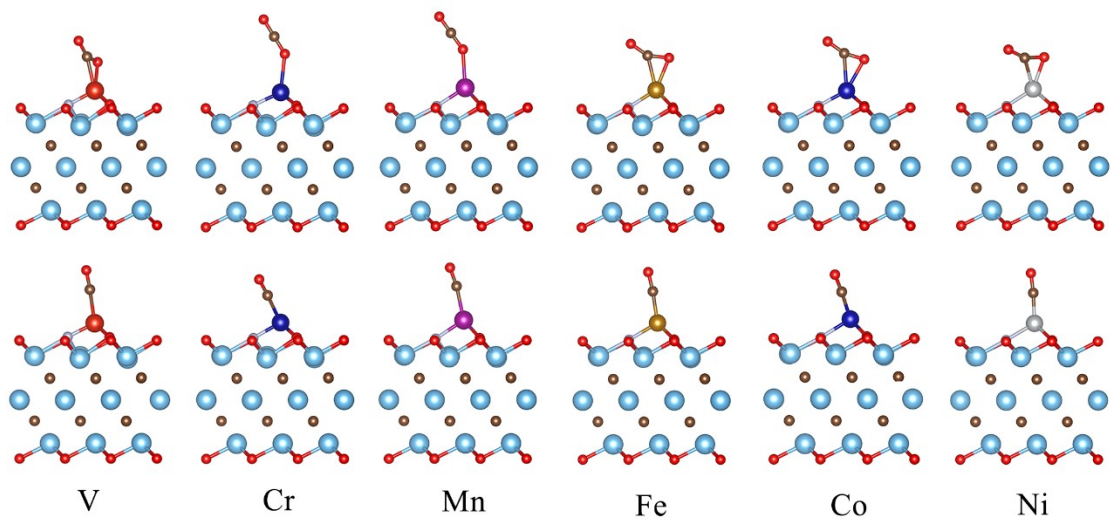

**Fig. S9** Optimized geometric structures of CO<sub>2</sub> and CO adsorbed on TM@Ti<sub>3</sub>C<sub>2</sub>O<sub>2-x</sub>B<sub>x</sub>.

**Table S1.** Calculated cohesive energies ( $E_c$ ) of metals and calculated binding energy - cohesive energy ( $E_b - E_c$ ) of metal at H site.

|       |                              | $Ti_3C_2O_{2-x}B_x$ | $Ti_3C_2O_2$ | $Ti_3C_2O_{2-x}B_x$   | $Ti_3C_2O_2$ |
|-------|------------------------------|---------------------|--------------|-----------------------|--------------|
| Metal | $E_c$ (eV/atom) <sup>a</sup> | $E_b$ (eV/atom)     |              | $E_b - E_c$ (eV/atom) |              |
| V     | -5.62                        | -7.62               | -5.48        | -2.00                 | 0.14         |
| Cr    | -4.04                        | -5.79               | -3.41        | -1.75                 | 0.63         |
| Mn    | -3.49                        | -5.50               | -3.51        | -2.01                 | -0.02        |
| Fe    | -4.73                        | -5.99               | -3.56        | -1.26                 | 1.17         |
| Co    | -5.01                        | -5.98               | -3.60        | -0.97                 | 1.41         |
| Ni    | -4.85                        | -5.85               | -3.51        | -1.00                 | 1.34         |

<sup>a</sup>  $E_c$  is the intrinsic characteristic of metal and the  $E_c$  data retrieved from reference<sup>3</sup>

**Table S2.** Adsorption Gibbs free energy ( $G_{ads}/eV$ ) of \*CO, \*CH<sub>2</sub>O and \*CH<sub>3</sub>OH reduction products on TM@ $Ti_3C_2O_{2-x}B_x$

|                         | CO    | CH <sub>2</sub> O | CH <sub>3</sub> OH |
|-------------------------|-------|-------------------|--------------------|
| V@ $Ti_3C_2O_{2-x}B_x$  | -1.8  | -3.17             | -1.03              |
| Cr@ $Ti_3C_2O_{2-x}B_x$ | -0.93 | -2.28             | -0.47              |
| Mn@ $Ti_3C_2O_{2-x}B_x$ | -1.10 | -1.45             | -0.36              |
| Fe@ $Ti_3C_2O_{2-x}B_x$ | -0.92 | -1.56             | -0.58              |
| Co@ $Ti_3C_2O_{2-x}B_x$ | -1.15 | -1.54             | -0.43              |
| Ni@ $Ti_3C_2O_{2-x}B_x$ | -1.3  | -1.24             | -0.47              |

**Table S3** The Gibbs free energy differences ( $\Delta G/eV$ ) for the possible elementary hydrogenation steps of subsequent \*CO reduction on TM/Ti<sub>3</sub>C<sub>2</sub>O<sub>2-x</sub>B<sub>x</sub>. The intermediate with red is more energetically preferred.

| Hydrogenation steps                                               | 3     | 4                  | 5                   | 6                    | 7     | 8                 |
|-------------------------------------------------------------------|-------|--------------------|---------------------|----------------------|-------|-------------------|
| V/Ti <sub>3</sub> C <sub>2</sub> O <sub>2-x</sub> B <sub>x</sub>  | *CHO  | *CH <sub>2</sub> O | *CH <sub>3</sub> O  | *O + CH <sub>4</sub> | *OH   | *H <sub>2</sub> O |
|                                                                   | -0.29 | -0.69              | 0.60                | -0.24                | -1.63 | 1.47              |
|                                                                   | *COH  | *CHOH              | *CH <sub>2</sub> OH | *CH <sub>3</sub> OH  |       |                   |
|                                                                   | 2.00  | 0.46               | 2.15                | 0.79                 |       |                   |
| Cr/Ti <sub>3</sub> C <sub>2</sub> O <sub>2-x</sub> B <sub>x</sub> | *CHO  | *CH <sub>2</sub> O | *CH <sub>3</sub> O  | *O + CH <sub>4</sub> | *OH   | *H <sub>2</sub> O |
|                                                                   | -0.30 | -0.66              | 0.16                | -0.43                | -0.34 | 0.96              |
|                                                                   | *COH  | *CHOH              | *CH <sub>2</sub> OH | *CH <sub>3</sub> OH  |       |                   |
|                                                                   | 0.73  | 0.67               | 1.55                | 0.91                 |       |                   |
| Mn/Ti <sub>3</sub> C <sub>2</sub> O <sub>2-x</sub> B <sub>x</sub> | *CHO  | *CH <sub>2</sub> O | *CH <sub>3</sub> O  | *O + CH <sub>4</sub> | *OH   | *H <sub>2</sub> O |
|                                                                   | 0.13  | -0.1               | 0.10                | -0.37                | -0.41 | 0.23              |
|                                                                   | *COH  | *CHOH              | *CH <sub>2</sub> OH | *CH <sub>3</sub> OH  |       |                   |
|                                                                   | 0.94  | 0.63               | 1.43                | 0.28                 |       |                   |
| Fe/Ti <sub>3</sub> C <sub>2</sub> O <sub>2-x</sub> B <sub>x</sub> | *CHO  | *CH <sub>2</sub> O | *CH <sub>3</sub> O  | *O + CH <sub>4</sub> | *OH   | *H <sub>2</sub> O |
|                                                                   | 0.15  | -0.40              | 0.30                | 0.22                 | -0.96 | 0.15              |
|                                                                   | *COH  | *CHOH              | *CH <sub>2</sub> OH | *CH <sub>3</sub> OH  |       |                   |
|                                                                   | 0.78  | 0.24               | 1.95                | 0.15                 |       |                   |
| Co/Ti <sub>3</sub> C <sub>2</sub> O <sub>2-x</sub> B <sub>x</sub> | *CHO  | *CH <sub>2</sub> O | *CH <sub>3</sub> O  | *O + CH <sub>4</sub> | *OH   | *H <sub>2</sub> O |
|                                                                   | 0.11  | -0.11              | 0.55                | 0.38                 | -0.58 | -0.18             |
|                                                                   | *COH  | *CHOH              | *CH <sub>2</sub> OH | *CH <sub>3</sub> OH  |       |                   |
|                                                                   | 0.74  | 0.42               | 1.72                | -0.17                |       |                   |
| Ni/Ti <sub>3</sub> C <sub>2</sub> O <sub>2-x</sub> B <sub>x</sub> | *CHO  | *CH <sub>2</sub> O | *CH <sub>3</sub> O  | *O + CH <sub>4</sub> | *OH   | *H <sub>2</sub> O |
|                                                                   | 0.52  | -0.08              | 0.68                | 0.85                 | -0.34 | -0.37             |
|                                                                   | *COH  | *CHOH              | *CH <sub>2</sub> OH | *CH <sub>3</sub> OH  |       |                   |
|                                                                   | 0.87  | 0.06               | 2.47                | -0.64                |       |                   |

**Table S4.** DFT-predicted potential determining steps (PDS), limiting potentials ( $U_L$ ) and active sites for production of  $CH_4$  on bimetal electrocatalysts. Data of  $CO_2RR$  on other bimetal electrocatalysts were retrieved from literature.

| Active site                                                       | PDS                                                                   | $U_L$ (V) | Ref.      |
|-------------------------------------------------------------------|-----------------------------------------------------------------------|-----------|-----------|
| Fe@Ti <sub>3</sub> C <sub>2</sub> O <sub>2-x</sub> B <sub>x</sub> | *CH <sub>2</sub> O+H <sup>+</sup> +e <sup>-</sup> =*CH <sub>3</sub> O | 0.40      | This work |
| Mn@Ti <sub>3</sub> C <sub>2</sub> O <sub>2-x</sub> B <sub>x</sub> | *CO+H <sup>+</sup> +e <sup>-</sup> =*CHO                              | 0.51      | This work |
| MnCu@2SV                                                          | *CO+H <sup>+</sup> +e <sup>-</sup> =*CHO                              | 0.61      | 4         |
| NiCu@2SV                                                          | *CO+H <sup>+</sup> +e <sup>-</sup> =*CHO                              | 0.70      | 4         |
| NiCo@C <sub>2</sub> N                                             | *CHO+H <sup>+</sup> +e <sup>-</sup> =*CHOH                            | 0.25      | 5         |
| Ni <sub>2</sub> @C <sub>2</sub> N                                 | *CO+H <sup>+</sup> +e <sup>-</sup> =*CHO                              | 0.67      | 5         |
| CuMn@BN                                                           | *HCOOH+H <sup>+</sup> +e <sup>-</sup> =*CHO + H <sub>2</sub> O        | 0.61      | 6         |
| Fe <sub>2</sub> @BN                                               | *CO+H <sup>+</sup> +e <sup>-</sup> =*CHO                              | 0.47      | 6         |
| RuFe@g-C <sub>3</sub> N <sub>4</sub>                              | *HCOO+H <sup>+</sup> +e <sup>-</sup> =*HCOOH                          | 0.58      | 7         |
| RuCu@g-C <sub>3</sub> N <sub>4</sub>                              | *HCOO+H <sup>+</sup> +e <sup>-</sup> =*HCOOH                          | 0.40      | 7         |
| Mn <sub>2</sub> @PC <sub>6</sub>                                  | *CO+H <sup>+</sup> +e <sup>-</sup> =*CHO                              | 0.31      | 8         |
| CrPd@PC <sub>6</sub>                                              | *CO+H <sup>+</sup> +e <sup>-</sup> =*CHO                              | 0.41      | 8         |
| AgCr@N6V4                                                         | *CO <sub>2</sub> +H <sup>+</sup> +e <sup>-</sup> =*COOH               | 0.38      | 9         |

## References

1. H. Niu, X. Wang, C. Shao, Z. Zhang and Y. Guo, *ACS Sustainable Chemistry & Engineering*, 2020, **8**, 13749-13758.
2. K. A. Persson, B. Waldwick, P. Lazic and G. Ceder, *Phys Rev B*, 2012, **85**, 235438.
3. C. Choi, S. Back, N.-Y. Kim, J. Lim, Y.-H. Kim and Y. Jung, *ACS Catal*, 2018, **8**, 7517-7525.
4. Y. Li, H. Su, S. H. Chan and Q. Sun, *ACS Catal*, 2015, **5**, 6658-6664.
5. Q. Huang, H. Liu, W. An, Y. Wang, Y. Feng and Y. Men, *ACS Sustainable Chemistry & Engineering*, 2019, **7**, 19113-19121.
6. B. Huang, Y. Wu, Y. Luo and N. Zhou, *Chem Phys Lett*, 2020, **756**, 137852.
7. S. Zhu, K. Wan, H. Wang, L.-J. Guo and X. Shi, *Nanotechnology*, 2021, **32**, 385404.
8. C. Li, X. Liu, F. Xu, D. Wu, H. Xu and G. Fan, *Electrochim Acta*, 2022, **426**, 140764.
9. S. Wang, L. Li, J. Li, C. Yuan, Y. Kang, K. S. Hui, J. Zhang, F. Bin, X. Fan, F. Chen and K. N. Hui, *J Phys Chem C*, 2021, **125**, 7155-7165.
